CORRECTION

# Correction: Complaints and Diagnoses of Emergency Department Patients in the Netherlands: A Comparative Study of Integrated Primary and Emergency Care

The *PLOS ONE* Staff

The second author's name is spelled incorrectly. The correct name is: Elske van Mierlo. The correct citation is: Thijssen WAMH, van Mierlo E, Willekens M, Rebel J, Sandel MH, Giesen P, et al. (2015) Complaints and Diagnoses of Emergency Department Patients in the Netherlands: A Comparative Study of Integrated Primary and Emergency Care. *PLoS ONE* 10(7): e0129739. doi:[10.1371/journal.pone.0129739](https://doi.org/10.1371/journal.pone.0129739). The publisher apologizes for the error.

## Reference

1. Thijssen WAMH, van Mierlo E, Willekens M, Rebel J, Sandel MH, Giesen P, et al. (2015) Complaints and Diagnoses of Emergency Department Patients in the Netherlands: A Comparative Study of Integrated Primary and Emergency Care. *PLoS ONE* 10(7): e0129739. doi:[10.1371/journal.pone.0129739](https://doi.org/10.1371/journal.pone.0129739) PMID: [26131564](https://pubmed.ncbi.nlm.nih.gov/26131564/)

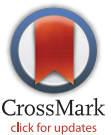

## OPEN ACCESS

**Citation:** The *PLOS ONE* Staff (2015) Correction: Complaints and Diagnoses of Emergency Department Patients in the Netherlands: A Comparative Study of Integrated Primary and Emergency Care. *PLoS ONE* 10(7): e0133947. doi:[10.1371/journal.pone.0133947](https://doi.org/10.1371/journal.pone.0133947)

**Published:** July 20, 2015

**Copyright:** © 2015 The PLOS ONE Staff. This is an open access article distributed under the terms of the [Creative Commons Attribution License](https://creativecommons.org/licenses/by/4.0/), which permits unrestricted use, distribution, and reproduction in any medium, provided the original author and source are credited.
